# Supplementary material for: Farmers’ and Herders’ Perceptions on Rangeland Management in Two Agroecological Zones of Benin
Source: MDPI journal article supplement (doi:10.3390/land10040425), 2021-04-16
Supplement: s1 [file s1]

**Supplementary files 1 :**

**Table S1:** Descriptions of the subgroups

|                          |                                   | Number of respondents (n) |           |            | Characteristics |                           |
|--------------------------|-----------------------------------|---------------------------|-----------|------------|-----------------|---------------------------|
|                          |                                   | Kandi                     | Kétou     | Total      | Herd size (n)   | Cultivated land size (ha) |
| <b>Agro-pastoralists</b> | Pure crop farmers                 | 4                         | 41        | 45         | 0               | 4.5                       |
|                          | Agro-pastoralists                 | 57                        | 1         | 58         | 13              | 7.8                       |
|                          | Big crop farmers with small herds | 16                        | 0         | 16         | 4               | 21                        |
|                          |                                   | <b>77</b>                 | <b>42</b> | <b>119</b> |                 |                           |
| <b>Herders</b>           | Mid-size herders with small farms | 41                        | 53        | 94         | 35.7            | 2.1                       |
|                          | Large herders with small farms    | 1                         | 13        | 14         | 124.6           | 2.1                       |
|                          | Pure herders                      | 1                         | 12        | 13         | 31              | 0                         |
|                          |                                   | <b>43</b>                 | <b>78</b> | <b>121</b> |                 |                           |

**Table S2:** Herders practices and rangeland use

|                                    | TOTAL<br>(n=121) | Districts       |                 | $\chi^2$       | $P \leq$     |
|------------------------------------|------------------|-----------------|-----------------|----------------|--------------|
|                                    |                  | Kandi<br>(n=43) | Kétou<br>(n=78) |                |              |
| <b>Using of same grazing area</b>  |                  |                 |                 | <b>24,789</b>  | <b>0.001</b> |
| Yes                                | 55.4             | 79.1            | 42.3            |                |              |
| No                                 | 42.1             | 14.0            | 57.7            |                |              |
| No answer                          | 2.5              | 7.0             | 0.0             |                |              |
| <b>Type of grassland use</b>       |                  |                 |                 |                |              |
| Natural pasture                    | 76.9             | 37.2            | 98.7            | <b>59.119</b>  | <b>0.001</b> |
| Fallow land                        | 11.6             | 30.2            | 1.3             |                |              |
| Cultivated land                    | 11.6             | 32.6            | 0.0             |                |              |
| <b>Grassland exploitation</b>      |                  |                 |                 | <b>104.391</b> | <b>0.001</b> |
| Permanent grazing                  | 20.7             | 58.1            | 0.0             |                |              |
| Rotational grazing                 | 10.7             | 30.2            | 0.0             |                |              |
| Mixed grazing                      | 67.8             | 9.3             | 100.0           |                |              |
| No answer                          | 0.8              | 2.3             | 0.0             |                |              |
| <b>Grassland state 5 years ago</b> |                  |                 |                 | <b>16.195</b>  | <b>0.001</b> |
| Dense                              | 90.9             | 76.7            | 98.7            |                |              |
| Less dense                         | 9.1              | 23.3            | 1.3             |                |              |
| <b>Current grassland condition</b> |                  |                 |                 | <b>66.435</b>  | <b>0.001</b> |
| Dense                              | 2.5              | 0.0             | 3.8             |                |              |
| Less dense                         | 74.4             | 34.9            | 96.2            |                |              |
| Degraded                           | 23.1             | 65.1            | 0.0             |                |              |
| No answer                          | 11.7             | 21.0            | 0.0             |                |              |

|                                                       |      |      |      |               |              |
|-------------------------------------------------------|------|------|------|---------------|--------------|
| <b>Does grassland degradation affect herd feeding</b> |      |      |      | <b>23.576</b> | <b>0.001</b> |
| Yes                                                   | 67.8 | 95.3 | 52.6 |               |              |
| No                                                    | 18.2 | 4.7  | 25.6 |               |              |
| No answer                                             | 14.0 | 0.0  | 21.8 |               |              |
| <b>Consequences</b>                                   |      |      |      | <b>26.023</b> | <b>0.001</b> |
| Low feeding                                           | 19.8 | 41.9 | 7.7  |               |              |
| Consumption of low quality grass                      | 43.0 | 44.2 | 42.3 |               |              |
| No answer                                             | 37.2 | 14.0 | 50.0 |               |              |
| <b>Solution: Feeding practices</b>                    |      |      |      | <b>18.592</b> | <b>0.001</b> |
| Feed supplementation                                  | 82.6 | 62.8 | 93.6 |               |              |
| Supplementation + Transhumance                        | 16.5 | 34.9 | 6.4  |               |              |
| No answer                                             | 0.8  | 2.3  | 0.0  |               |              |

**Table S3:** Different practices of agro-pastoralists on lands (n=119)

|                         | TOTAL<br>(n=119) | Districts       |                 | $\chi^2$ | $P \leq$ |
|-------------------------|------------------|-----------------|-----------------|----------|----------|
|                         |                  | Kandi<br>(n=77) | Kétou<br>(n=42) |          |          |
| <b>Productive field</b> |                  |                 |                 | 44.562   | 0.001    |
| Yes                     | 21.0             | 2.6             | 54.8            |          |          |

|                                   |      |      |       |        |       |
|-----------------------------------|------|------|-------|--------|-------|
| No                                | 79.0 | 97.4 | 45.2  |        |       |
| <b>Mineral fertilizer use</b>     |      |      |       | 2.093  | 0.148 |
| Yes                               | 47.1 | 51.9 | 38.1  |        |       |
| No                                | 52.9 | 48.1 | 61.9  |        |       |
| <b>Crop rotation</b>              |      |      |       | 0.489  | 0.484 |
| Yes                               | 49.6 | 51.9 | 45.2  |        |       |
| No                                | 50.4 | 48.1 | 54.8  |        |       |
| <b>Cattle corralling on field</b> |      |      |       | 1.679  | 0.195 |
| Yes                               | 2.5  | 3.9  | 0.0   |        |       |
| No                                | 97.5 | 96.1 | 100.0 |        |       |
| <b>Fallowing</b>                  |      |      |       | 5.840  | 0.016 |
| Yes                               | 11.8 | 6.5  | 21.4  |        |       |
| No                                | 88.2 | 93.5 | 78.6  |        |       |
| <b>Fire arrangement</b>           |      |      |       | 25.284 | 0.001 |
| Yes                               | 38.7 | 22.1 | 69.0  |        |       |
| No                                | 61.3 | 77.9 | 31.0  |        |       |

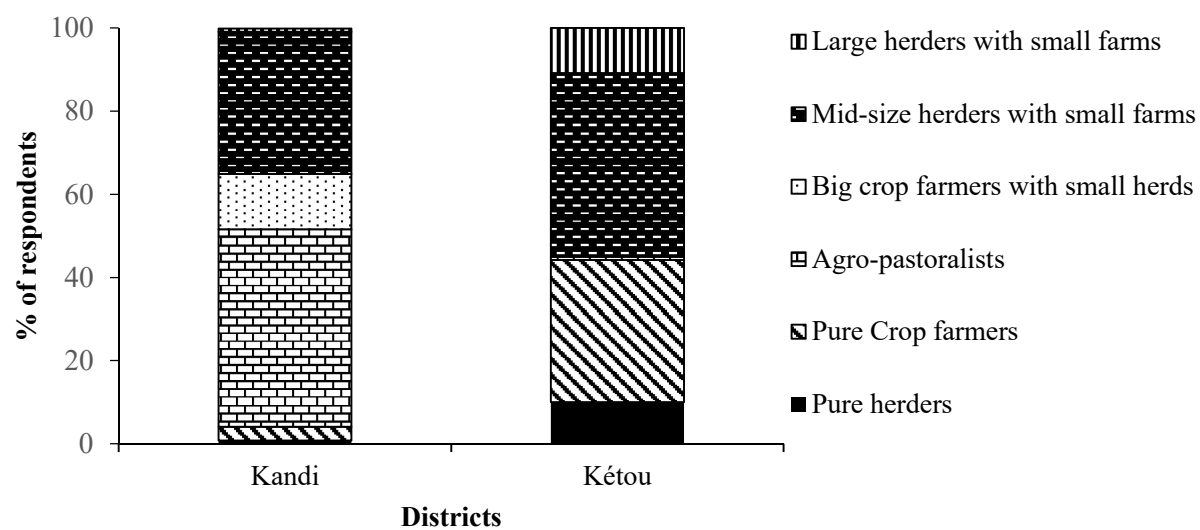

**Figure S1.** Distribution of the different sub-groups of farmers surveyed in the municipalities of Kandi in northeastern and Kétou in southeastern Benin.
